# Supplementary material for: Association of AR-V7 and Prostate-Specific Antigen RNA Levels in Blood with Efficacy of Abiraterone Acetate and Enzalutamide Treatment in Men with Prostate Cancer
Source: Oxford University Press journal article supplement (doi:10.1158/1078-0432.ccr-16-1070), 2016-08-03
Supplement: 10780432ccr161070-sup-165683_1_supp_3566295_29n25t.docx [file 10780432ccr161070-sup-165683_1_supp_3566295_29n25t.docx]

Supplementary Material and Method Information

***Cell lines and Reagents***

The prostate cancer cell lines 22RV1, DU-145 were obtained from the American Type Culture Collection (ATCC, authenticated by ATCC). Cells were maintained with 10% fetal bovine serum (FBS) at 37°C in a humidified atmosphere with 5% CO2. Total RNA from cells was extracted with Trizol reagent (Invitrogen) according to the manufacturer’s protocol. To confirm the authentication of the 22RVI cell lines used, we analyzed the expression and sequences of AR splice variants and confirmed the authentication.

The full-length AR cDNA plasmid was obtained from Dr. Myles Brown laboratory. The AR-V7 plasmid (pCMV-3xFlagAR-V7) was generously provided by Dr. Plymate (University of Washington, Seattle, Washington). The plasmid DNA was linearized and purified before adding it to the ddPCR reaction. DNA concentrations were determined using Qubit 2.0 Fluorometer (Thermofisher scientific) and serial dilutions of standard were carried out according to the calculated copy numbers. To confirm the authentication of DU145, we confirmed that it is AR negative/ PSA negative and is of a mutated P53.

***Primers and probes***

Sequences of the primer pairs and probes used were as follows.

AR-V7, Forward: 5’- GGAAATGTTATGAAGCAGGGATG -3′; Reverse: 5’- GGTCATTTTGAGATGCTTGCA -3′; Probe: 5’- CTCTGGGAGAAAAATTCCGGGTTGG -3′. AR-FL, Forward: 5’- TGCAGCCTATTGCGAGAGA -3′; Reverse: 5’- TGATCTCTGCCATCATTTCCG -3′; Probe: 5’- TCACACATGGTGAGCGTGGACTT -3′. PSA, Forward: 5’- CCCACTGCATCAGGAACAA -3′; Reverse: 5’- TGAAATACCTGGCCTGTGTC -3′, Probe: 5’- TGGGTCGGCACAGCCTGTTT -3′. Probes and primers were custom synthesized by Bio-Rad.
